# Supplementary material for: Versican is crucial for the initiation of cardiovascular lumen development in medaka (Oryzias latipes)
Source: PubMed Central journal article supplement (PMC6603046; doi:10.1038/s41598-019-45851-3), 2019-07-01
Supplement: 41598_2019_45851_MOESM1_ESM.pdf [file 41598_2019_45851_MOESM1_ESM.pdf]

**Versican is crucial for the initiation of cardiovascular lumen development in medaka (*Oryzias latipes*)**

Nishant Mittal<sup>1</sup>; Sung Han Yoon<sup>2</sup>; Hirokazu Enomoto<sup>1</sup>; Miyama Hiroshi<sup>1</sup>; Atsushi Shimizu<sup>3</sup>; Atsushi Kawakami<sup>4</sup>; Misato Fujita<sup>5</sup>; Hideto Watanabe<sup>6</sup>; Keiichi Fukuda<sup>1</sup>; Shinji Makino<sup>1,7\*</sup>

<sup>1</sup> Department of Cardiology, Keio University School of Medicine, 35-Shinanomachi Shinjuku-ku, Tokyo 160-8582, Japan

<sup>2</sup> Department of Interventional Cardiology, Cedars-Sinai Medical Center, 8700 Beverly Boulevard, AHSP A9229, Los Angeles, CA 90048, USA

<sup>3</sup> Division of Biomedical Information Analysis, Iwate Tohoku Medical Megabank Organization, Iwate Medical University, 2-1-1 Nishitokuta, Yahaba-cho, Shiwa-gun, Iwate 028-3694, Japan

<sup>4</sup> Department of Biological Information, Tokyo Institute of Technology, 4259 Nagatsuta, Midori-ku, Yokohama 226-8501, Japan

<sup>5</sup> Department of Biological Science, Graduate School of Science, Kanagawa University, 2946 Tsuchiya, Hiratsuka-Shi, Kanagawa-Ken 259-1293, Japan

<sup>6</sup> Institute for Molecular Science of Medicine, Aichi Medical University, 1-, Yazakokarimata, Nagakute, Aichi 480-1195, Japan

<sup>7</sup> Keio University Health Centre, 35-Shinanomachi Shinjuku-ku, Tokyo 160-8582, Japan

\* Corresponding author: [smakino@keio.jp](mailto:smakino@keio.jp)

## Supplementary figures

**Fig. S1: Wild-type and *lht* mutant embryos are phenotypically indistinguishable.** Phase contrast microscopic image showing representative WT and *lht* mutant embryos at 40 hpf (n = 10). Wild-type and mutant embryos were phenotypically similar at this stage. Scale bar: 0.2 mm (A–D). Heartbeat rate of WT and *lht* mutant medaka embryo, at 2 dpf and 3 dpf (n = 13). The WT and *lht* mutant medaka exhibited a similar heartbeat rate (E,F). Each bar represents the mean  $\pm$  SEM from 13 individual samples. Student's *t*-test, \*\*\**P* < 0.0001, N.S., not significant.

**Fig. S2: Amino acid sequence alignment of medaka, human, and mouse versican.** Amino acid sequence of medaka, human, and mouse versican aligned by the ClustalW program shown with their UniProt accession codes. The black box indicates the region of high homology and corresponds to the G1 and G3 domains. The rest of the amino acid sequence belongs to the G2 domain.

**Fig. S3: Analysis of versican mRNA expression in medaka.** RT-PCR and qPCR data for versican expression in various organs of adult medaka (A, B). Versican expression was prominent in the heart, eyes, gills, muscle, ovary, and testis. Whole-mount *in situ* hybridization for versican at multiple stages of embryonic development (C). Versican expression was prominent in the eye, heart tube, and ICM until 48 hpf (C; left and middle panels). At 72 hpf, the embryo shows strong versican expression in the gill region (C; right panel). Versican expression in the heart at various stages of cardiac development (D). (n > 10) (B). ICM, intermediate cell mass. Scale bar: 500  $\mu$ m (C), 100  $\mu$ m (D). Each error bar represents the SEM from 3 individual samples.  $\beta$ -Actin was used as endogenous reference gene to calculate  $\Delta$ CT value. To calculate  $\Delta\Delta$ CT, testis was selected randomly as reference sample.

**Fig. S4: The 3' UTR sequence of the versican region of interest is conserved in all medaka strains.** We used the same set of primers we designed for genotyping, and analysed the sequence for QURT1, HN1, Hd-rR, Kaga, and Ok-cab. The region of interest did not show any polymorphism (A). Western blot results for the versican expression in WT embryo, *lht* embryo, WT cell line transfected with either ctrl MO or versican MO (B). This result was obtained when a new lot of MC-955 (versican) antibody was used. Cell lines derived from WT medaka embryos were transfected with either ctrl or versican MO, and immunoassayed with versican G2 domain specific (MC-955) antibody (C). From three independent experiments, the total number of cells expressing versican around the cell boundary were counted using GFP

expression and nuclear staining by DAPI (D). Morpholino (MO) injection assays and quantification data (E–F). Versican-a MO was injected at the one-cell stage into embryos obtained from WT zebrafish. A morphant injected with versican-a MO (0.5 mM) phenocopies the *lht* mutant (C). Graphical representation of versican-a MO (0.5 mM) showing all the *lht* mutant phenotypes (D) ctrl: control. The results are represented as mean percentages of three independent experiment, mean  $\pm$  SD.

**Fig. S5: Comparative study of mRNA and protein levels in WT and *lht* mutant medaka.** Structural representation of the V0, V1, V2, and V3 versican isoforms (A). Versican mRNA expression data for WT and mutant embryos using qPCR (B). RT-PCR results show the comparison of mRNA expression levels at the exon-exon boundary of WT and the *lht* mutant (C). Primers were designed for exon boundaries. Coloured regions indicate the specific isoform exon-exon boundaries. RT-PCR results show the comparison of mRNA expression levels at the exon-exon boundaries of WT and the *lht* mutant (n = 3). Cell lines derived from WT and *lht* mutant embryos were immunoassayed with a versican G1 domain-specific antibody. In the WT-derived cell line, versican was expressed at the cell membrane (D; left panel). However, versican expression was absent at the cell membrane of the *lht* mutant-derived cell line (D; right panel). Each error bar represents the SEM from three individual samples.  $\beta$ -Actin was used as endogenous reference gene to calculate  $\Delta$ CT value. To calculate  $\Delta\Delta$ CT, WT was selected as reference sample. Student's *t*-test, \*\*\* $P < 0.0001$ , N.S., not significant.

**Fig. S6: The *lht* mutant displays constriction of the outflow tract.** Stereomicroscope images of embryos injected with fluorescence beads into the sinus venosus at 4 dpf. Panels A and B show the bright field images and panels C and D show the fluorescent images. The fluorescent beads injected into the heart (C) flowed into the vascular network of WT embryos (D), but pooled in the heart tube of *lht* mutant embryos that lacked blood circulation. Scale bar: 200  $\mu$ m (A–D)

**Fig. S7: Versican loss of function did not alter the chamber-specific differentiation of cardiomyocytes.** *In situ* hybridization for the cardiac-specific genes *cmhc2* (A, B), *amhc* (C), and *vmhc* (D) (n > 10) in the heart at 3 dpf. Red circle marks the presence of *cmhc2*-positive cells localized near the outflow tract. Scale bar: 100  $\mu$ m (A–D).

**Fig. S8: The heart of the *lht* mutant medaka embryo did not show any apoptosis at 50 hpf.** Analysis of apoptosis in live embryos with acridine orange staining examined with a

KEYENCE fluorescence microscope. We did not find any apoptotic cells in the *lht* mutant heart. The white arrow indicates acridine orange positive apoptotic cells in the head region of WT and *lht* mutants.

**Fig. S9: The heart of the *lht* mutant medaka embryo did not show any differences in cardiomyocyte proliferation compared to that of WT at 50 hpf.** Analysis of cardiomyocyte proliferation by whole-mount immunohistochemistry at 50 hpf, using a phosphohistone H3 antibody. The z stack images were obtained by confocal microscopy (A, B). There was no significant difference in the rate of cardiomyocyte proliferation between WT and *lht* mutant embryos (C). White arrows indicate the phosphohistone H3 positive cells in the heart. Each bar represents the mean  $\pm$  SEM from nine individual samples. Student's *t*-test, \*\*\**P* < 0.0001, N.S., not significant.

**Fig. S10: The *lht* mutant shows disrupted endothelial alignment.** Time-lapse microscopic images of WT (*n* > 15) (A–D) and *lht* mutant embryos (*n* = 5) (E–H) at 38, 42, 46, and 50 hpf. Embryos obtained from a Tg(*fli1*:GFP):*lht* heterozygous cross were dechorionated and embedded in 1% low-melt agarose. These embryos were kept under the microscope for the duration of the time-lapse imaging from 32 to 50 hpf. Images were taken at 20 min intervals. The temperature was maintained at 28.5°C throughout the experiment. A, atrium; CCV, common cardinal vein; V, ventricle. Scale bar: 100  $\mu$ m.

**Fig. S11: The expression of *etgase* is specific to yolk sac blood vessels.** Bright field image of *etgase* mRNA expression in WT embryos, after removal of the yolk, using *in-situ* hybridization. *etgase* was expressed exclusively in yolk sac blood vessels.

**Fig. S12: Mutation in 3'UTR in the *lht* mutants creates putative binding sites for microRNA mmu-miR 871-3p.**

**Fig. S13: Full-length gels of Figure 2F.** Note: WT: wild type, het: heterozygous, *lht*: *lht* homozygous mutant.

**Fig. S14: Full-length gels of Figure S4B.** Note: WT: wild type, *lht*: *lht* homozygous mutant, Ctrl MO: medaka fibroblasts nucleofected with control morpholino, versican MO: medaka fibroblasts nucleofected with versican morpholino.



**Fig. S1**

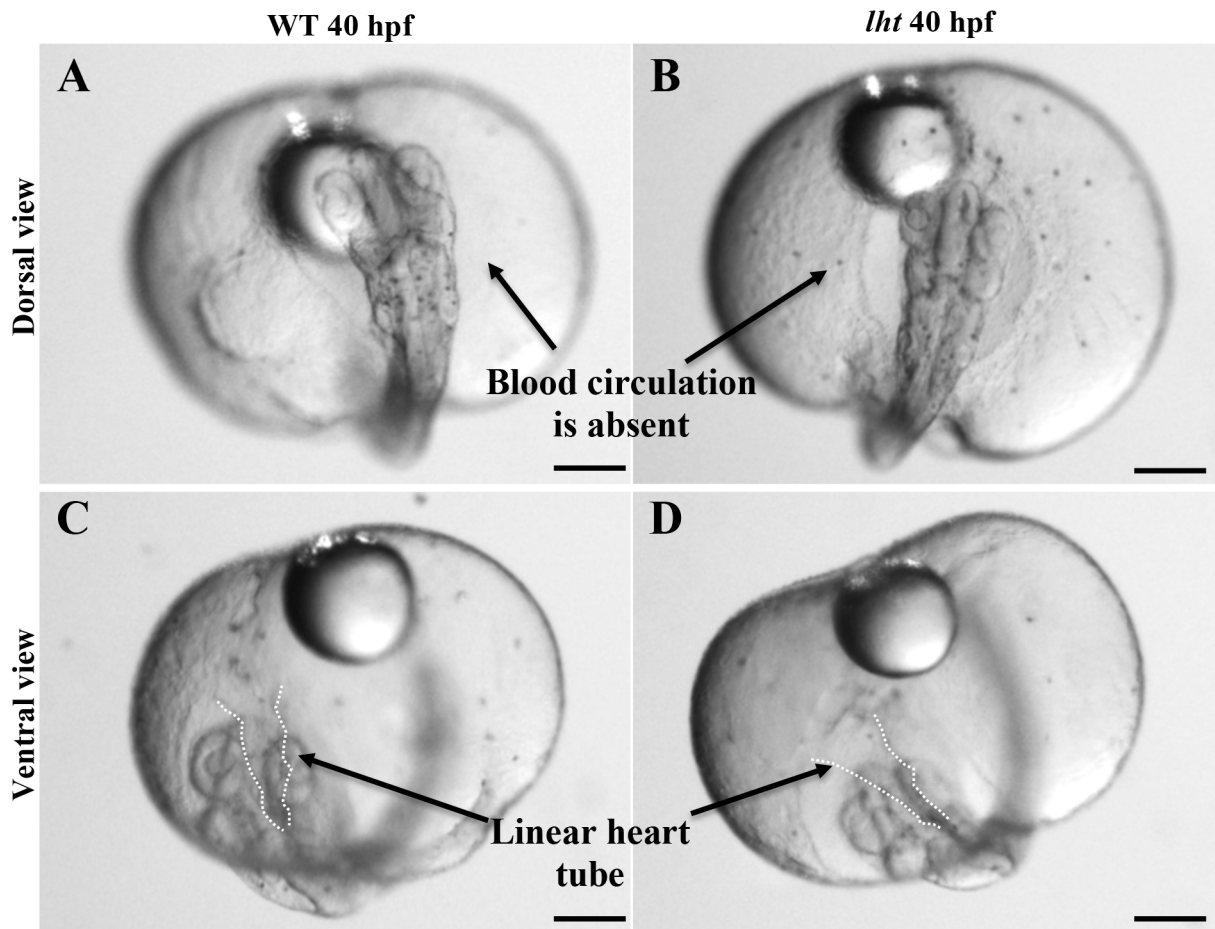

**E**

| Embryo stage | WT embryo (Mean $\pm$ SEM) | <i>lht</i> mutant embryo (Mean $\pm$ SEM) | P value |
|--------------|----------------------------|-------------------------------------------|---------|
| 2 dpf        | 109 $\pm$ 2.14             | 105 $\pm$ 1.66                            | 0.145   |
| 3 dpf        | 125.92 $\pm$ 1.51          | 125.77 $\pm$ 1.87                         | 0.956   |

**F**

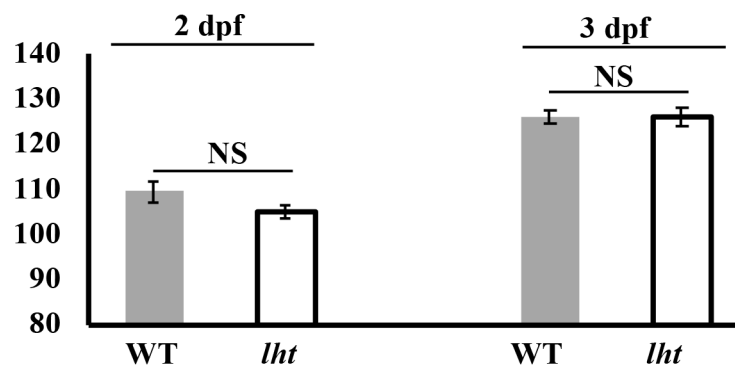

G1 domain

MEDAKA MILNIRHILWLYLSEAAAAATASHAISILKPITGSLSGKVNLP CYFSTIPT SAPLIGPNG 60  
HUMAN MFINIKSILWMCSTLIVTHALHKVKVKGSPVVRGSLSGKVS L PCHFSTMP TLPPSYN--- 57  
MOUSE MLINMKGILWMCSTLLLTHALHQAKMETSPPVKGSLSGKV L PCHFSTLP TLPPNYN--- 57  
\*::\*::: \*\*\*: : \* . : \* : \*\*\*\*\* \*\*\*:\*\*\*:\*\*\* \* .  
  
MEDAKA SITYGRDLLRIKWTKIQRN-----TESVVLVAQNGVIKIGKSYRNRVSVPSHPEDVGDA 114  
HUMAN ----TSEFLRIKWSKIEVDKNGKDLKETTVLVAQNGNIKIGQDYKGRVSVPTHPPEAVGDA 113  
MOUSE ----TSEFLRIKWSKMEVDKNGKDIKETTVLVAQNGNIKIGQDYKGRVSVPTHPDDVGDA 113  
:\*\*\*\*\*:\*\*\*: : .\*:\*\*\*\*\* \*\*\*\*\*:\*.\*\*\*\*\*:\*\*\*: \*\*\*\*  
  
MEDAKA SLTMVKLRASDAGTYRCEVLYGIEDTQDTISLDVRGVVFHYRAKTSRYTLDYQKAVRACQ 174  
HUMAN SLTVVKLLASDAGLYRCDVMYGIEDTQDTVSLTVDGVVFHYRAATSRYTLNFEAAQKACL 173  
MOUSE SLTMVKLRASDAGVYRCDVMYGIEDTQDTMSLAVDGVVFHYRAATSRYTLNFAAAQQAACL 173  
\*\*\*:\*\*\* \*\*\*\*\* \*\*\*:\*.\*\*\*\*\*:\*\*\* \* \*\*\*\*\* \*\*\*\*\*: : \* : \*\*  
  
MEDAKA DIGATIATYDQLKAAAYEDGFDQCDAGWIADQTVRYPI TKPRKGC FGNLMTNPGIRSYGTR 234  
HUMAN DVGAVIATPEQLFAAYEDGFEQCDAGWLADQTVRYPIR APRVGCY GDKMGKAGVRTYGF 233  
MOUSE DIGAVIASPEQLFAAYEDGFEQCDAGWLS DQTVRYPIR APRREGCY GDMMGKEGVRTYGF 233  
\*:.\*\*.\*: :\*\* \*\*\*\*\*:\*\*\*\*\*:\*\*\*\*\* \*\* \*\*.\*: \* : \*:.\*\*.\* \*  
  
MEDAKA KPTETYDVYCYVDKLDGEVYYAPVTRMMTFEEASEECKRNAV L ATPGQLHAAWRQGLDR 294  
HUMAN SPQETYDVYCYVDHLDGDV FHLTVPSKFTFEEAAKECENQDARLATV GELQA AWRNGFDQ 293  
MOUSE SPQETYDVYCYVDHLDGDV F HITAPSKFTFEEAEAECTSRDARLATV GELQA AWRNGFDQ 293  
. \* \*\*\*\*\*:\*\*\*:\*. : . :\*\*\*\*\* \*\* .:.\* \*\* \*:.\*\*\*\*\*:\*\*\*:  
  
MEDAKA CDYGWLS DG SVRHPVAVSRIQC GGGLLGVRTMYRYRNQTGFPEPTMKLGAYCFKGRRDVF 354  
HUMAN CDYGWLS DASVRHPVTVARAQCGG L LGVRTLYRFENQTGFPPDSRFDAYCFKPK E--- 350  
MOUSE CDYGWLS DASVRHPVTVARAQCGG L LGVRTLYRFENQTCFPLPDSRFDAYCFKPKQNIS 353  
\*\*\*\*\* . \*\*\*\*\*:\*. \* \*\*\*\*\*:\*\*\*:\*. \*\* \* \* .:.\* \*\*\*\*\* :.  
  
MEDAKA NQTSLV DVSV IDIT TASI VSTTSMPLLESSTNAVSTT SAPVTEGDQSKDSAAATNTPFMF 414  
HUMAN -ATTI-DLSIL-----AETASPSLSKEPQMVSDRTP I-----I PLVD 386  
MOUSE EATTI-EMNIL-----AETSSPSLSKEPHMVPDRATPV-----I PLAT 390  
\*:: : : : : : \* : \* \* . . : \* : : \* : \* :  
  
MEDAKA STSMAPSSFP SADREEDLIT--TIAPTIKEEDDTFDI-----VTPMFNIDDFGTVDEES 466  
HUMAN ELPVIPTEFPVGNIVSFEQKATVQQAITDSLATKLP TPTGSTK KP WDMDDYSPS---- 442  
MOUSE ELPIFTTHFP PAGNIVNSEQKSVVYSQAITGRLAMESPTTTRNTINSWDLNDSLAS---- 446  
. : : \*\* . . . . : . : . : : : \*  
  
MEDAKA VPKRGDVRYPSIPTESSNDTVSDPDDPSVIKISTI QPDVLMPGSSVDTKT-MFAEGKTE 525  
HUMAN -----ASGPLGLDISEIKEEVLQSTTGVS HYATDSWDGVVE 479  
MOUSE -----GSGPLGMPDISEIKEEELRSTTVISQHATGSQAVITE 483  
. . . \*\* \* : : \* : : . : . \*  
  
MEDAKA EAFVHSSITAAVTS DVTETPKGAIPEETPPFDYDKDIDDTFIHVEVMPPVQ---VFNEE 582  
HUMAN DKQTQESVTQI-----EQIEVGPLVTSMEILKHI 508  
MOUSE DTQTHESVSQI-----EQIEVGPLVTSMEITNHI 512  
: . . . \* : : : : \* \* \* : : .  
  
MEDAKA PSS-----SPATST-TTVTTPLMCKTLP GTTELPSTTHTGTQTILETHDMDSNAKSGT 634  
HUMAN PSKEFPVTE-TPLVTARMILESKTEKKMVSTVSELVTTGHYGF TL-GEEDEEDRTLT VGS 566  
MOUSE SLKELPEKNKTPYESTEV TLEHTTEMP TVSASPELATTSHYGF TL-REDDREDRTLT VRS 571  
. : \* : : : : \* \* \* \* \* . \* . . :  
  
MEDAKA TAITKVDGETTTPHETLSARGDIFDESGSQTAVQKTGTEAEG----QL---FTSTR TAPA 687  
HUMAN D-----ESTLIFDQIPEVITVSKTSED TIHTHLEDLESVSASTTVSP- 608  
MOUSE D-----QSTRVFSQIPEVITVSKTSED TTYSQLGDLESISTST----- 609  
\*:. : . :\*.\*\* . : : \* : \*\*

MEDAKA AASVLTSRSAVISEFQPL-ETSDITKTQDASGNPHTVPLNL\*IEQLK\*QMLLLDFC\*FN 746  
HUMAN -LIMPDNNGSSMDDWEERQTSGRITE--EFLGKYLSTTPF---PSQHRTEIELFPYSGDK 662  
MOUSE -ITMLGTDRLIDKEKEPKTNGKVTE--DEFGSQPTTTF---PSQHLTEVELLPYSGDT 663  
: . : : . : . : \* : \* . : . \* : : \* : . .

MEDAKA LI\*FMFGIHLVYFLEI\*ITVIMVLLPQWLL\*VKA\*VS\*RFVSL\*VLFLRILVY--DEV-- 802  
HUMAN --ILVEGISTVIYPSLQT-----EMTHRE-RTET-LIPEMRTDITYT-DEIQE 705  
MOUSE --TSVEGISTVIYPSLQT-----DVTQGRE-RTET-PRPELKKDPYTVDEIPE 707  
: \*\* \* : : : : . . \* : : : \* \*\*:

MEDAKA -----WLQGS\*TSYYN\*FQIGEKRS--FLCI--KKEFTKNNRFFLFFLLFLVCLYVFSI 852  
HUMAN EITKSPFMGKTEEEVFSGMKLSLSEPIHVTESSVEMTKS---FDF-----PT 751  
MOUSE KVTKDPFICKTE-EVFSGMPLSTSSSES-----SVERTES---VSP-----AL 746  
: : : . : . : . \* . \* \* : . .

MEDAKA YLLQVFFK\*SDILILT---ERR\*V\*NAAH\*YSEIT\*M\*LFHSQPCSFLIIWGFKIVLEV 908  
HUMAN LITKLSAEPTEVRDMEEDFTA---TPGTTKYDENITTVLLAHGT----- 792  
MOUSE TIEKLTVPKTEARDVEEMTTLTRLETVDVTKSDKDVTRVHLTHST----- 790  
: : : : : : : : \* : \* \* .

MEDAKA TFF\*PICFKVYLKILFMLV\*SMINFSIMFCCSFS\*H\*NVMFQLFCFFSASSV\*VFFWHT 968  
HUMAN -----LS-----VEAATVSKWSW 805  
MOUSE -----LN-----VEVVTVSKWPG 803  
: : . . . \* \*

MEDAKA T\*IKFC\*KQLS\*-----QVLYFNIFIN--FKENPSL\*SRTG-----V 1003  
HUMAN DEDNTTSKPLESTEPSASSKLPPALLTTVGMNGKDKDIPSFTEDEGADEFTLIPDSTQKQL 865  
MOUSE DEDNSTSKPLPSTEHAGFTKLPVPLSTIGINGKDKDIPSFTEDEGADEFTLIPDSTQKQL 862  
: \* \* . : : \* \* : \* : . . :

MEDAKA KQDSHKSFNALRAYLL\*FHTSGNMCFICKQLMH-----MSRFLSGSE 1045  
HUMAN EEVTDEDIAAHGKFTIRFQPTTSTGIAEKSTLRDSTTEEKVPPITSTEGQVY-ATMEGSA 924  
MOUSE EKVSEEDLA-SGELTVTFHTSTSIGSAEKASASGEPTTGDRFLPTTSTEDQVINATAEGSA 921  
: : : : : : \* : : . \* . \*\*

MEDAKA LQVFL\*\*RIFSP\*RTF\*VRGKGFA\*LEEMQVLYLVIWQNCQTLWFFHKVLMHNNHNP 1105  
HUMAN LGEVEDVDLSKP----VSTVPQFAHTSEVEGLAFVSYSTQEPTT----YVDSSHTIPLS 976  
MOUSE LGE--DIEASKP----LFTGPPFVHTSDVEELAFVNYSTQEPTT----YVDISHTSPLS 971  
\* . \* \* . : : \* : \* : . : : : : \* \*

MEDAKA AIPQCMWSVWLLVYITVYYTH\*KTQWCAQI\*FFFLCIFIARNHVVPEFLFMCVTS\*LTT 1165  
HUMAN VIPKTDWGVLVPSVPESEDEVLGEPDILVIDQTRL-----EATISPETMRT---TKITE 1028  
MOUSE IIPKTEWSVLETSVSLEDEILGKSDQDIL--EQTHL-----EATMSPGALRT---TGVSQ 1021  
\*\* : \* . \* \* \* \* . : \* : : : :

MEDAKA RLAITGVCWQITATHRCTVDNTS\*GDVIA-NSQSPLSVRVAGDCLTKAAHYSYFYCYSM\* 1224  
HUMAN GTTQEEFPWKEQTAEKP-VPALSSSTAWTPKEAVTPLDEQ-EGD----GSAYTVSEDELLT 1082  
MOUSE GETQEEP----QTPGSP-FPTFSSTAVMAKET---TAFE-EGE----GSTYTPSEGRMT 1068  
: : . \* : : . \* : . : \* : :

MEDAKA SAETLGLFAALPVFVWE-----NLVENLVALENSVLSGCVITKYIL\*CQCAKNITEW 1276  
HUMAN GSERVPVLETTVPVKIDHSVSYPPGAVTEHKVKTDEVVTLTPRIGPKVSLSPGPE----- 1137  
MOUSE GSERVPGLETTVPVGT-----SYPPGAI TDQEVEMDTMVTLMSTIRPTVVSSTEPE----- 1118  
. : \* : : : \*\* : : : \* : \* \* : . :

MEDAKA TLSCAQKWWCYELYPSGLD\*LMTVQFTVYQVFIWNIMTWEIACLGCEQOMSE----NNS 1332  
HUMAN -----QKYETEGSSTTG-FTSSLSPFSTHTQLMEET-TTE--KTSLEDIDLGSGL 1184  
MOUSE -----VIYEAEGSSPTE-FASTLRPFQTHVTQLMEET-TEEGKKASLDYTDLGSGL 1167  
\* \* \* . : : : : : : \* : : : : . .

MEDAKA \*KPPAIHSFCK\*ICNISVCVVLG\*LSMTFLEMH\*FTFKS\*FMYGLHF-----KAEGK 1385  
HUMAN FEKPKATELIEF-STI--KVTVPSDITTAFFSSVDRLHTTSAFKPSSAITKKPPLIDREPG 1241  
MOUSE FEP-RATELPKF-PTT-----PSD-ISVFTAIDSLHRTPLSPSSSFTEEQRVFEEESS 1218  
: : : . . . \* : : . : . : . \*

MEDAKA \*KTKS-----FLIRLKNPYDGNHRAK----- 1406  
HUMAN EETTSDMVIIGESTSHVPPTTLEDIVAKETETDIDREYFTTSSPPATQPTRPPTVEDKEA 1301  
MOUSE EKT TGD-ILPGESVTQHPVTTLIDIVAMKTESDIDH---MTSKPPVTQPTRPSVVERKTT 1274  
:\*.. . \* \*

MEDAKA -----RKL\*--NFSYVLF\*ND-----DSISS-----RNDVQ 1430  
HUMAN FGPQALSTPQPASTKFFHPDINVYIEVRENKTGRMSDLSVIGHPIDSESKEDPCSEET 1361  
MOUSE SKTQELSTSTPAAGTKFFHPDINVYIEVRENKTGRMSDMI VSGHPIDSESKEEPCSEET 1334  
\* : \* : : . : \* . \* : :

MEDAKA DGWHRLLAIFSSVFA\*ILTMSLTF SRLHIDEHFKKFYHNKLEEHL\*FRVLYIKSHPKSKI 1490  
HUMAN DPVHDLMAEILPEFPDIEIDL-----YHSENEEEEEEECA-----NATDV 1402  
MOUSE DPLHDLFAEILPELPDSFEIDI-----YHSEDEDEGEDCV-----NATDV 1375  
\* \* \* : : : : : \*\* . : : \* . : :

MEDAKA EKESKEYINLLVNI\*KNI IKL\*KQQQQXXXXXXXXXXXXXXXXXXXXXXXXXXXXXXXXXXXX 1550  
HUMAN TTTPSVQYINGKHLV----TTVPKDPEA----- 1426  
MOUSE TTTPSVQYINGKQLV----TTVPKDPEA----- 1399  
.. \* :\*\*\* : : \* : :

MEDAKA XXXXXXXXXXXXXXXXXXXXXXXXXXXXXXXXXXXXXXXXXXXXXXXXXXXXXXXXXXXXXXX 1610  
HUMAN -----  
MOUSE -----

MEDAKA XXXXXXXXXXXXXXXXXXXXXXXXXXXXXXXLKPQQEHNKFSH-QANPLMS\*QN----LKHP 1664  
HUMAN -----AEARRGQFESVAPSQNFSDSSES DTHPFVIAKTELSTAVQPN 1468  
MOUSE -----AEARRGQYESVAPSQNFDPSSATDTHQFILAE TESSTTMQFK 1441  
: \* . \* : . \* : : : : . : :

MEDAKA QLSYLQTPKD\*VWKQVCHQANPQHVP-----QV----- 1692  
HUMAN ESTETTESLEVTWKPETYPETSEHFSGGEPDVFPVTFHEEFESGTAKKGAESVTERDTE 1528  
MOUSE KSKEGTELLEITWKPETYPETPDHVSSGEPDVFP T LSSHG----KTTRWSESITESSPN 1497  
: . : . \*\* : . : \* . :

MEDAKA -----LH--CSAQRSLHHCLSKMILL\*T\*QYCQLRHLVTKQKIILPLPQI 1737  
HUMAN VGHQAHEHTEPVSLFPPEESSGEIAIDQESQKIAFARAT--EVTFGEEVEKSTSVTYTPTI 1586  
MOUSE LENPVHKQPKPVPLFPPEESSGEGAIEQASQETILSRAT--EVALGKETDQSPTLST-SSI 1554  
\* . \* : . . \* : : : \* : . . : . \*

MEDAKA V\*\*-----ITLITP--KKRSSQRITSAVQ\*NPFVLTVELH--CPLK\*LQCS-- 1780  
HUMAN VPSSASAYVSEEEAVTLIGNPWPDDLSTKESWVEATPRQVVVELSGSSSIPITEGSGEAE 1646  
MOUSE LSSSVSVNVLEEEPLTLTGISQTDSESMSTIESWVEITPSQTVKFSESSAPIIEGSGEVE 1614  
: : \*\* . . \* \* : . \* : : . . \* : . .

MEDAKA -APQKVLGMAQMISRKTHS\*QQLCLQPM-----QYHHLW\*HLRTLKKVRLWEQPILLQ 1833  
HUMAN EDEDTMFTMVTDLQRNT--DTLITLDTSR IITE-SFFEVPATTIYPVS--EQ----- 1695  
MOUSE ENKNKIFNMVTDLPQRDPT--DTLSPLDMSKIMITNHHIYIPATTAPLDS--KL----- 1664  
: : : \* . : : : : \* : : . : \* : :

MEDAKA HCSAVQK\*FHLKPQQEHNKF--SHQANLWMS\*QNLKHPQLNY\*QTPID\*VWKQVCHQANP 1891  
HUMAN -----PSAKVVPTKVFVSETDTSEWISSTTVEEKKRKE-EEGT-----TGT 1734  
MOUSE -----PSPDARPTQFGIQTATSEWSDKSFEGRKREDEEGA-----VNA 1704  
. . : \* . . \* \* : : : : . .

MEDAKA QHVPQVLHCSAQRSLHHCLSKKMILLWT\*QCCQLLHLLTKQKIILPLPQIVW\*ITLIIP 1951  
HUMAN ASTFE-VYSSTQRSDQLIL-----PFELE-----SPNVATSSDSGTRKSFMSLT 1777  
MOUSE AHQGE-VRAATERSDHLLL-----TPELE-----SSNVDASSDLATWEGFILET 1747  
: : .:::\*\* : \* : : . : :

MEDAKA KKRSSQRITSAVQ\*NPFVLTVELHCLPK\*LQCSAPQKVLGMAQMIHERLTHNSNCVXXX 2011  
HUMAN TPTQSERE----MTDSTPVFTET-----NTLENLGAQTTEHSSIHQ-PG 1816  
MOUSE TPTESEKE----MANSTPVFRET-----IGVANVEAQPFEHSSSSH-PR 1786  
. .\*: : : \*\* : : : \*.\*

MEDAKA XTDSGTSFSSKIASMLSTTESSGDGTDFT--KDSLITAT-----VSSTQGTVSPSVV 2062  
HUMAN VQEGLTTLPRSPASVF-MEQSGEAAADPETTTVSSFSLNVEYAIQAEKEVAGTSLPHVE 1875  
MOUSE VQEELTTLSGNPPSLF-TDLGSGDASTGMELITASLFTLDLESETKVKKELPSTPSPSVE 1845  
: \*\*: . \*: .\*\*:: . \* : : .. \* \*\* \*

MEDAKA ASLTPKSETLGTASTAATLLSSTDKVLSETSARIQQIFTSSKPLDESTKPEASSIKLST 2122  
HUMAN TTFSTEP-----TGLVLSTVMDRVVAENITQTS----- 1903  
MOUSE ISSSFEP-----TGLTPSTVLDIEIAGVMSQTS----- 1873  
: : \* \* . : \* : : : .

MEDAKA DAQRLSVETGVPSSKPTARPTGSSLFSTEKPTSLFVKENDTVTVDLT-ILPVTSPGNQTE 2181  
HUMAN REIVISERLGEPNYGAEIRGFSTGFPLEEDFSGDF-REYSTVSHPIAKEETVMMEGSGDA 1962  
MOUSE QKTLISEISGKPTSQSGVRDLYTGFFPMGEDFSGDF-SEYPTVSYPTMKEETVGMGGSDE 1932  
:\* \* \*. \* : : \* . : \* \* \*\* : \* \*

MEDAKA DYPSTSDSVVDHLDHTQETFIPKDYVSSTVKSFSTTDSGKSLPSVHMPSVKDITYTDM 2240  
HUMAN AFRDTQTSPSTVP-----TSVHISHISDSEGPSSTM 1993  
MOUSE RVRDTQTSSSIPT-----TSDNIYPVPDSKGPSTV 1963  
. .\*\* \* . \* : . : . : :

MEDAKA ESSTDLPDEESSN-DESGSGLTEFTTESL-----IEFIVTTDE-----AEINE 2283  
HUMAN VSTSAFPWEEFTSSAEGSGEQLVTVSSSVVPLPSAVQKFSGTASSIIDEGLGEVGTVNE 2053  
MOUSE ASTTAFPWEEVMSAEGSGEQLASVRSSVGPVPLAVDIFSGTESPYFDEEFEEVAAVTE 2023  
\* : : \* \*\* \* . : \*\* . \* . : : : : \* . . : .\*

MEDAKA TGSTLKIVST-----ASSTYSLTLPSTQSS-HLAS----- 2312  
HUMAN IDRRSTILPTAEVEGKAPVEKEEVKVSQTVSTNFPQTIEPAKLWSRQEVNPNRQEIIESE 2113  
MOUSE ANERPTVLPAAAGNTVDLTENGYIEVNSTMSLDLFPQTMESKLSKPEVNLDKQEIGRE 2083  
. : : \* . . . \* \* : \* . \* : \* \*

MEDAKA -----KSLPLE 2318  
HUMAN TTSEEQIQEEKSFESPQNSPATEQTIFDSQTFTELEKTTDYSVLTTKKTYSDDKEMKEE 2173  
MOUSE TVTKEKAQGQKTFESLHSSFAPEQTILETQSLIETEFQTSDYMLTTLKTYITNKEVEEE 2143  
\* . : \*

MEDAKA -QSSVDFSVDISSANSSESFTFKPSIILERKPFLSTAHTVDPQATFLYSTEKAIASSLDI 2377  
HUMAN DTSLVNMSTPDPDANGLESYTTLPEATEKSHFFLATALVTESIPAHEV----VTDSPIKK 2229  
MOUSE GMSIAHMSTPGPGIKDLESYTTTPEAPGKSHSFSATALVTESGAARSV----LMDSSSQE 2199  
\* . : \* . : . \*\* : \* \* . : : \* : \*\* . : : \* .

MEDAKA HTSVNIFPTFHSTEKPSVPTAFKVS PFH---TVRTQSPPEILNLSRVQLLTEDKTS GDPA 2434  
HUMAN EESTKHFPKGM RPTIQESDTELLFSGLSGEEVLP LPTESVNFTEVEQINNTLYPHT-- 2287  
MOUSE EESIKLFQKGVKLTNKNESADLSFSGLSGGEA-LPPLPTTSVNL TDMKQIISTLYAET-- 2256  
. \* : \* . . : : \* : \* : \*\* : : : .

MEDAKA NESFISKLLVLGNFTSSTPTGKTESLPALDNLSFS---LEGETAEYTKDS-LISQATDSS 2490  
HUMAN -----SQVEST-----SSDKIEDFNRMENVAKEVGPLVSQTDIFEGSGSVTSTLIEI 2335  
MOUSE -----SHMESLGT---SILGDKMEDHERMEDVSNEVRMLISKTGSI SQDS---TEALD TT 2305  
\* : : . \* \* . : : : . \* . : \* . : :

MEDAKA TGNDGANLPRNTLHPSHTASLLTPESLKSQDQTVPDFTSETVSSLKDKVSSIPTAFPTIIY 2550  
HUMAN LSDTGAEGPTVA-----PLPFST--- 2353  
MOUSE LSHTGTEEPTTS-----TLPFVKLM- 2325  
.. \*:: \* : \*

MEDAKA RSIADQQVGIITPSTKQVETIKAGQPTMVLHEPKASISVYKIFTEEAKENNELISGGTE 2610  
HUMAN -----DIGHPQ-----NQTV---RWAEIIQ----- 2370  
MOUSE -----DLersp-----KQTL---RWEETQ----- 2342  
. : : : \*\* :

MEDAKA SLTPESITSEFITKDNAI--I---DTISTAQVPPFFYPVTLTSGGIKADTKAQKLMIMEET 2665  
HUMAN TSRPQTITEQDSNKNSSSTAEINETTTSSTDFLARAYGFEMAKEFVTSAPKPSDLYEYPSG 2430  
MOUSE THRPQTMISGLISNENSSASEAEEAATSPTAFLPQTYSEMVKHFAPSESQPSDLFNVNSG 2402  
: \*::: : : \* \* : \* : : : : \* .

MEDAKA EGSGTARSAIILTPSPSILSAAPKSESVTLTSHGIISTM----- 2703  
HUMAN EGSGEVDIVDSFHTSATQATRQESSTTFVSDGSLEKHPEVPSAKAVTADGFPTVSVMLP 2490  
MOUSE EGSGEVDTLDLVYTSGTTQASSQG-DSMLASHGFLEKHPEVSKTEAGATDVSPTASAMFL 2461  
\*\*\*\* . \* . .\*: : . :.\*.\* :..

MEDAKA -----RTERD-----SA-----KT----- 2712  
HUMAN LHSEQNKSSPDPTSTLSNTVSYERSTDGSFQ--DRFREFEDSTLKPNRKKPTENIIDLD 2548  
MOUSE HHS-EYKSSLYPTSTLPSSTEPYKSPSEGIEDGLQDNIQFEGSTLKPSRRKTTESIIDLD 2520  
: : \*

MEDAKA SENYDDLSVKMITSSVYSMFS-----TQKPTLDTKDIVPGDLDQSIFTLSTA 2759  
HUMAN KED-KDLILTITESTILEILPELTSKNTIIDIDHTKPVYEDILGMQTDIDTEVPSEPHD 2607  
MOUSE KEDSKDLGLTITESAIVEILPELTSKNTIIDIDHTKPVYEYIPGIQTDLDPEIKLESHG 2580  
.\*: .\* : : \* : : : \*\* . : : \* : \*

MEDAKA DS-NISENTLLSETLETETPVSIPEETFKTEKD----ETQTLHSSGVSEQ-KKEF--L 2811  
HUMAN SNDESNDSTQVQEIYEAAVNLSLTHEETFEGSADV-LASYTQATHDESMTYEDRSQLDHM 2666  
MOUSE SS----EESLQVQEKYEGAVTLSPTTEESFEGSGDALLAGYTQAIYNESVTPNDGKQAEI 2636  
.. : : .\* \* . : \* \*\* : : . \*\* : : : : : : :

MEDAKA PIGRITSAPTHEEITSSVEISPNASTVSPQSTPKSKVTVQFVTTFALQPDTIQTIVETFQ 2871  
HUMAN GFHFTTGIPAPSTETELDVLLPTATSLPIPRKSATV----- 2702  
MOUSE SFSFATGIPVSSTETELHTFFPTASTLHIPSCLTTA----- 2672  
: \* . \* . \* . : \* . \* : : \*

MEDAKA HARSEPHQFRNDSSLESKQVRSEIQSTQTPQANHNSQDASLTTILPISTSHQGSQITKF 2931  
HUMAN -----IPEIE-----GIKAEAKALDDMFESSTLSGDQAIADQ 2734  
MOUSE -----SPEID-----KPNIEAISLDDIFESSTLSGDQAIADQ 2704  
\*\* : : : \* : : \*\* : \* . \* .

MEDAKA TAIHPGDHSVTEAGSVLEDGKTLKLTTPKSSDTKYI-----DNIDYTAPD----- 2976  
HUMAN SEIIPTLGQFERTQEEYEDKK----HAGPSFQPEFSSGAEALVDHTPYLSIATTHLMDQ 2790  
MOUSE SEVISTLGHLEKTQEEYEEKK----YGGPSFQPEFFSGVGEVLTDPAYVSIYSTYLIAQ 2760  
: : . : . \* : \* \*\* : : : \* \* :

MEDAKA --YDLVDPIRLESVPKYKNNSKEMEDSLAKPQTPISTSPISFYESGSESTSSSEESMPLT 3034  
HUMAN SVTEVPDVMEGSNPPYYTDT-TLAVSTFAKLSSQTPSSPLTIYSGSEASGH---TEIPQP 2846  
MOUSE TLTELPNVVRPSDSTHYTEA-TPEVSSLAELSPQIPSSFPVYVDNGVSKF---PEVPHT 2816  
: : : . . \* : . : : \* : . \*\* : \* . . \* . : \*

MEDAKA STAKV-----DSYVRGKIPSDLLSPTTTMSSVLDPG 3065  
HUMAN SALPGIDVGSVMSFPQDSFKEIHVNIETATFKPSSEYELHITEPPS-LSPDTKLEPSEDDG 2905  
MOUSE SAQPVSTVTSSQKSIESPFKEVHANIEETIKPLGG-NVHRTEPPS-MSRDPALDVSEDES 2874  
\* : : . \* . : \* : . \* .

MEDAKA LQSVNSLTMSVKPYKE----NTRRL-----EEQLRLTDEILAVFKEYSTAASRTET-FNS 3115  
HUMAN KPELL-EEMEASPTELIAVEGTEILQDFQNKTDGQVSGEAIKMFPTIKTPEAGTVITTAD 2964  
MOUSE KHKLL-EELETSPTK-----PETSQDFPNKAKDHI PGETVGMLAGIRTTESEPI-TAD 2926  
.: :...\* : . : . : . \* : : : \* : .

MEDAKA DNTLGNVQNL-----STVPMENSEITSRIPAKSASSTTQSMQE----SATSVATTA-L 3163  
HUMAN EIELEGATQWPHSTSASATYGVVWLSLPQTSEPTLSSSPEINPETQAALIRGQDS 3024  
MOUSE DMELGGATQQPHSA--SAAFRVETGMVPQPIQQEPPERPTFPSL-EINHETHSLF--GES 2981  
: \* .. : : : \* . : : \* \* \* : : : :

MEDAKA PIPVEDGKQPGDLLSSVTEG--GQSLEKK-EKSTPPPVAL-----D-LGHTVVGE 3209  
HUMAN TIAASEQQVAARILDSNDQATVN-PVEFNTEVATPPFSLLETSNETDFLIGINEESVEGT 3083  
MOUSE ILATSEKQVSKILDNSNQATVSSSTLDLHTAHALSPFSILDNSNETAFLIGISEESVEGT 3041  
: . . : : \* . . : . . : : : \* \* . . : \* \*

**G3 domain**

MEDAKA TMEIPGLYSCAKNICLNGGSCYKSGSVLSCSCAPGYTGPLCENDIDECHSNPCRNGGTCV 3269  
HUMAN AIYLPGPDRCKMNPCLNGGTCYPTETSIVCTCVPGYSGDQCELDQCECHSNPCRNGATCV 3143  
MOUSE AVYLPGPDLCKTNPCLNGGTCYPTETSIVCTCAPGYSGDQCELDQCECHSNPCRNGATCV 3101  
.: : \*\* \* \* \* \* \* : \* : : \* : \* \* \* : \* \* \* : \* \* \* \* \* \* \* \* \* \*

MEDAKA DGLASFSCVCLPSYTGLYCESDTETCEYGWHKFQGHCKYKHFQQRKNWDSAERECRMQGAH 3329  
HUMAN DGFNTFRCLCLPSYVGALCEQDTECDYGWHKFQGCYKYFAHRRTWDAARECRLQGAH 3203  
MOUSE DGFNTFRCLCLPSYVGALCEQDTECDYGWHKFQGCYKYFAHRRTWDAARECRLQGAH 3161  
\*\* : \* \* : \* \* \* \* \* \* \* \* \* \* \* \* \* \* \* \* \* \* \* \* \* \* \* \* \* \* \* \* \* \* \* \* \* \* \* \*

MEDAKA LTSILSHEEQLFVNRLGQDYQWIGLNDKVFQNDFRWTDGSSVQYEHWRPNQPDSFFSSGE 3389  
HUMAN LTSILSHEEQMFVNRVGHDYQWIGLNDKMFEDFRWTDGSTLQYENWRPNQPDSFFSAGE 3263  
MOUSE LTSILSHEEQMFVNRVGHDYQWIGLNDKMFEDFRWTDGSALQYENWRPNQPDSFFSAGE 3221  
\* \* \* \* \* \* \* \* \* \* \* \* \* \* \* \* \* \* \* \* \* \* \* \* \* \* \* \* \* \* \* \* \* \* \* \* \* \* \* \* \* \*

MEDAKA DCVVLIIWHEDGQWNDVPCNYHLTYTCKKGTVACSQPPVVENARTYGKKRERYEINSLVRY 3449  
HUMAN DCVVI IWHENGQWNDVPCNYHLTYTCKKGTVACGPPVVENAKTFGKMKPRYEINSLIRY 3323  
MOUSE DCVVI IWHENGQWNDVPCNYHLTYTCKKGTVACGPPVVENAKTFGKMKPRYEINSLIRY 3281  
\* \* \* \* \* : \* \* \* \* \* : \* \* \* \* \* \* \* \* \* \* \* \* \* \* \* \* \* \* \* \* \* \* \* \* \* \* \* \* \* \* \*

MEDAKA RCRTGFIQRHVPTIRCRGDGRWDVPKITCLNPSSYQRSFIRRHQHQRSL-----YSVNN 3504  
HUMAN HCKDGFQRHLPTIRCLGNRWAI PKITCMNPSAYQRTYSMKYFKNSSSAKDNSINTSKH 3383  
MOUSE HCKDGFQRHLPTIRCLGNRWAMPKITCMNPSAYQRTYSKKYLKNSSSAKDNSINTSKH 3341  
: \* : \* \* \* \* \* : \* \* \* \* \* \* \* \* \* \* \* \* \* \* \* \* \* \* \* \* \* \* \* \* \* \* \* \* \* \* \*

MEDAKA FKKWQEDSFHSGYRRYRGRDRNEHKRKKVSSK\* 3539  
HUMAN DHRWSR-----RWQESRR----- 3396  
MOUSE EHRWSR-----RRQETRR----- 3354  
: \* . . : \* : \*

Fig. S3

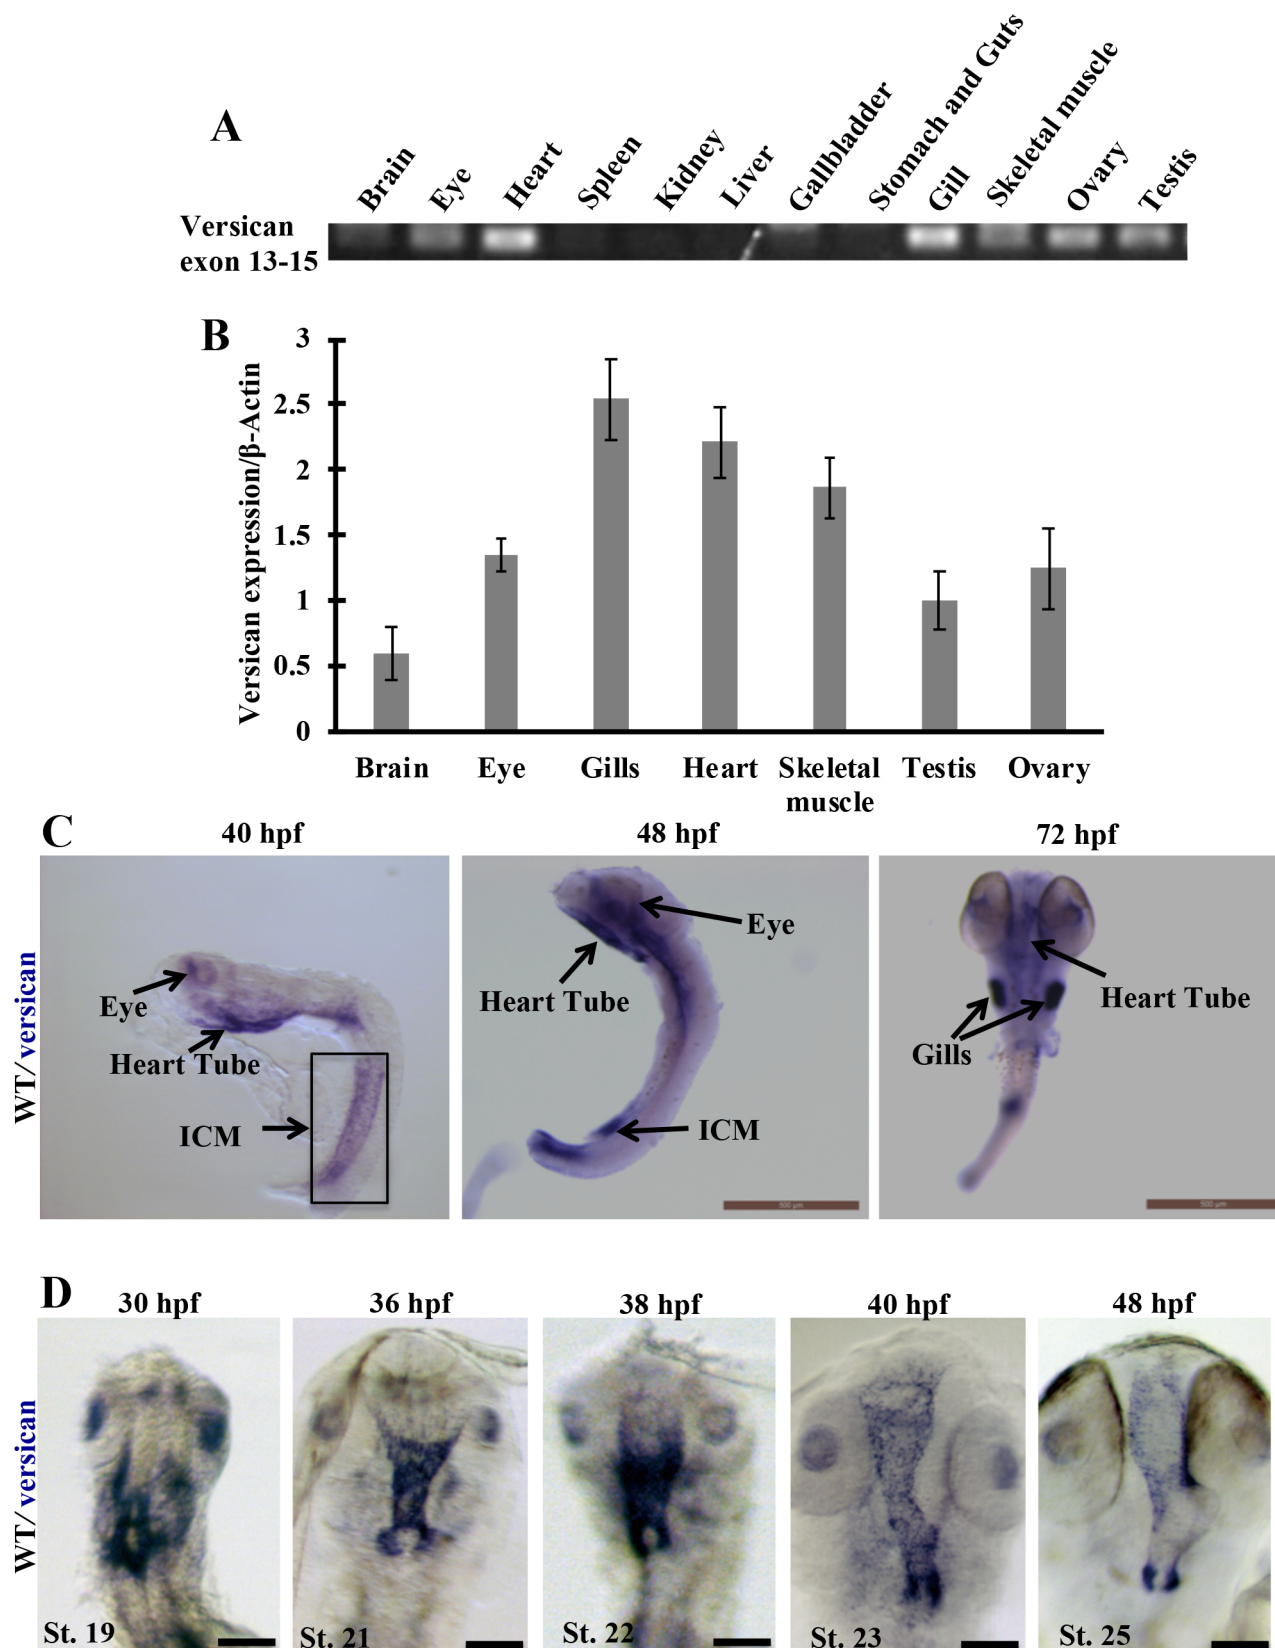



**Fig. S4**

**A**

| Strains | 3' UTR Sequence              |
|---------|------------------------------|
| QURT1   | ACATCCTAATTGGATTTCAGAAAGTTGC |
| HN I    | ACATCCTAATTGGATTTCAGAAAGTTGC |
| Hd-rR   | ACATCCTAATTGGATTTCAGAAAGTTGC |
| Kaga    | ACATCCTAATTGGATTTCAGAAAGTTGC |
| Ok-Cab  | ACATCCTAATTGGATTTCAGAAAGTTGC |

**B**

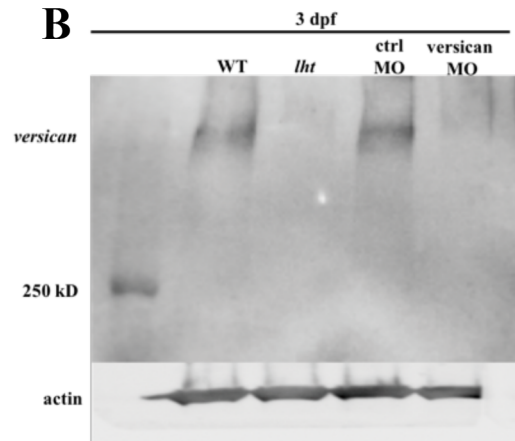

**C**

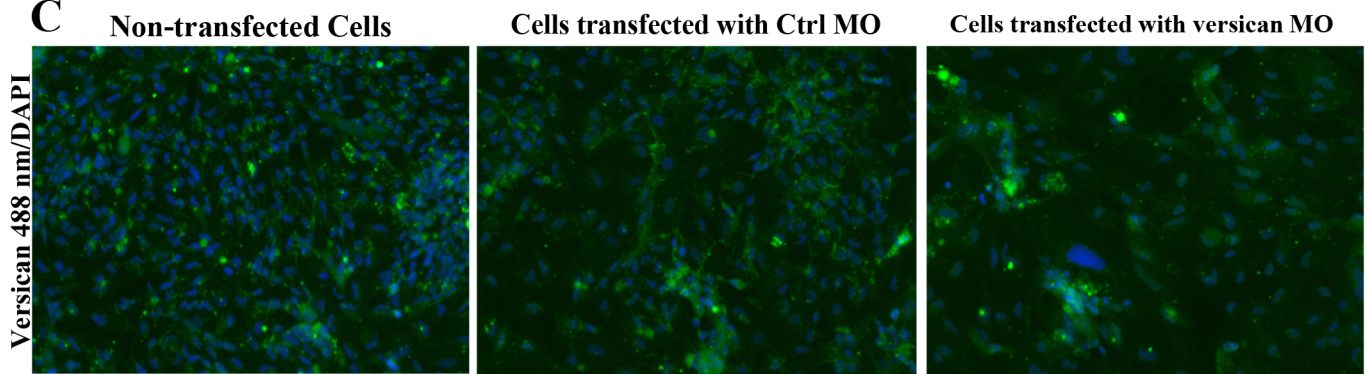

**D**

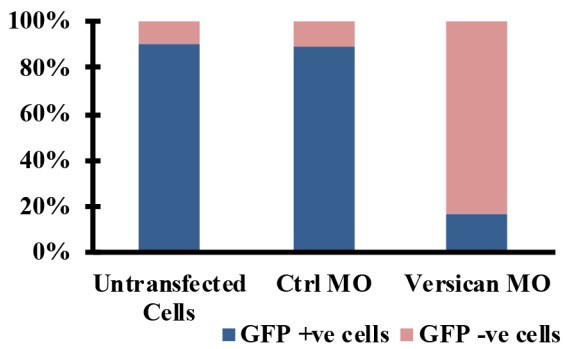

**F**

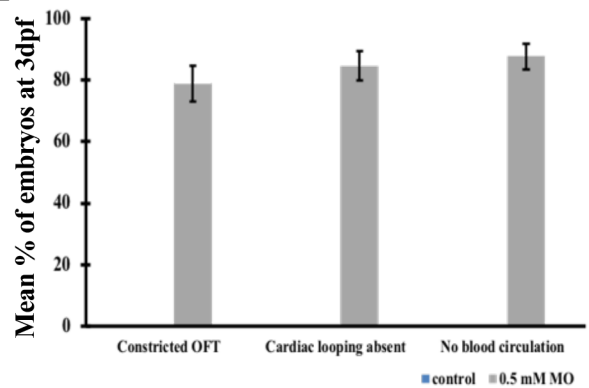

**E**

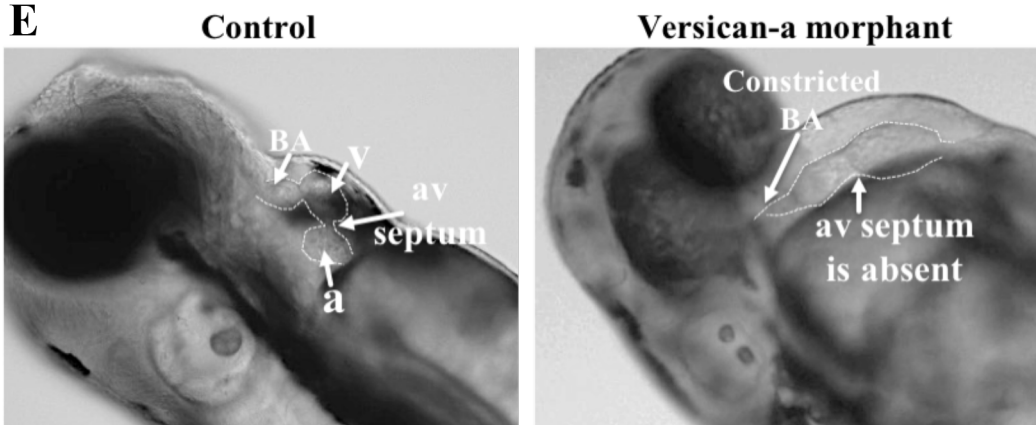

**Fig. S5**

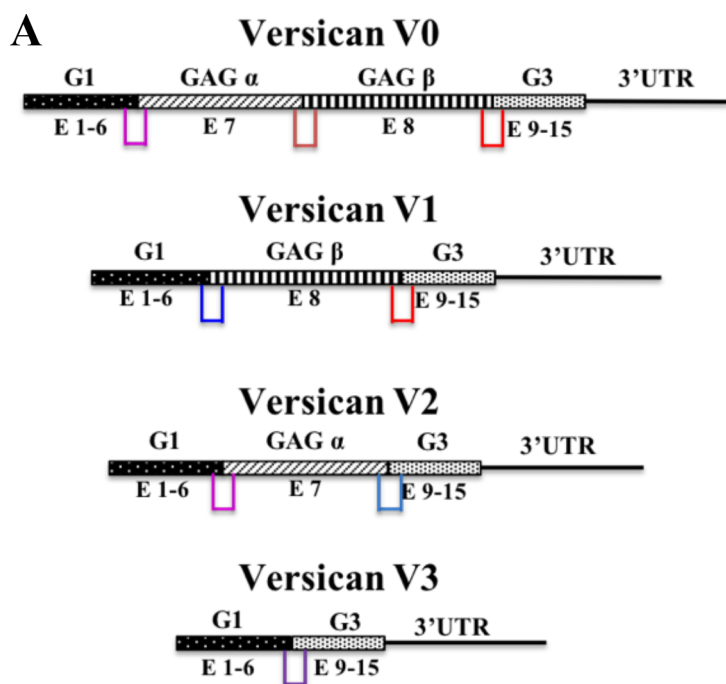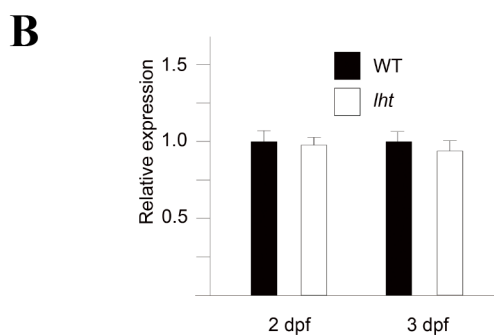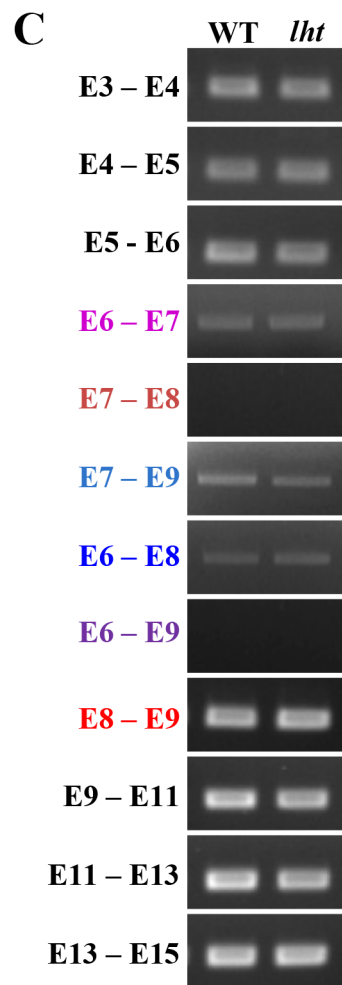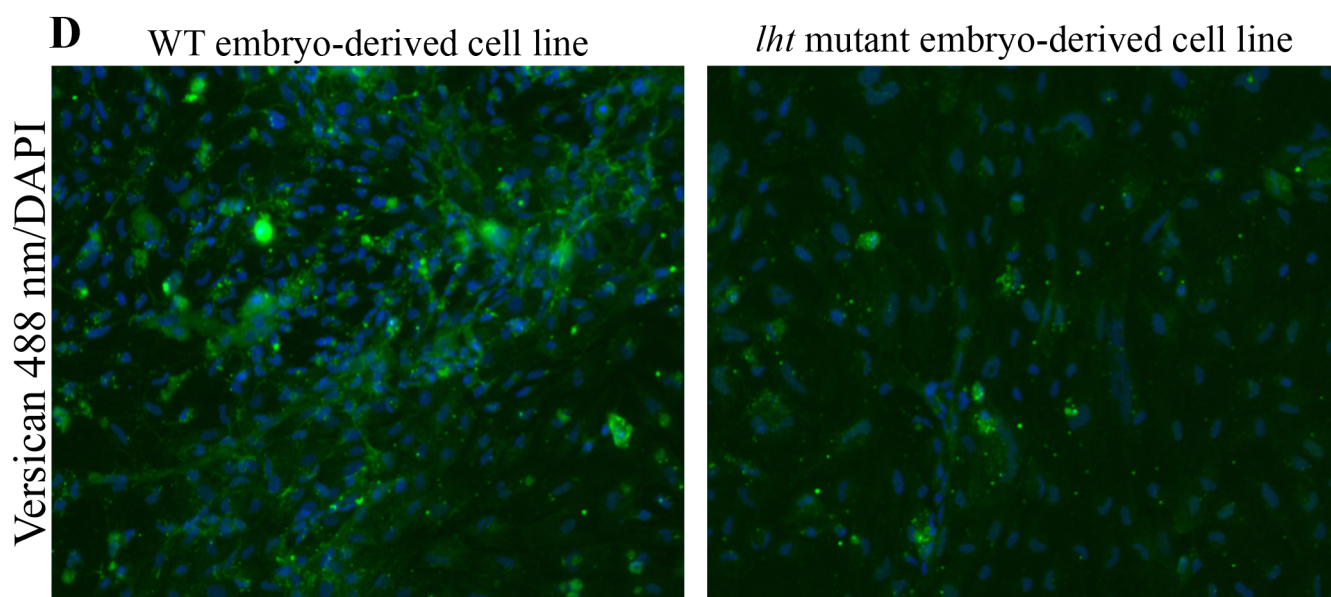

**Fig. S6**

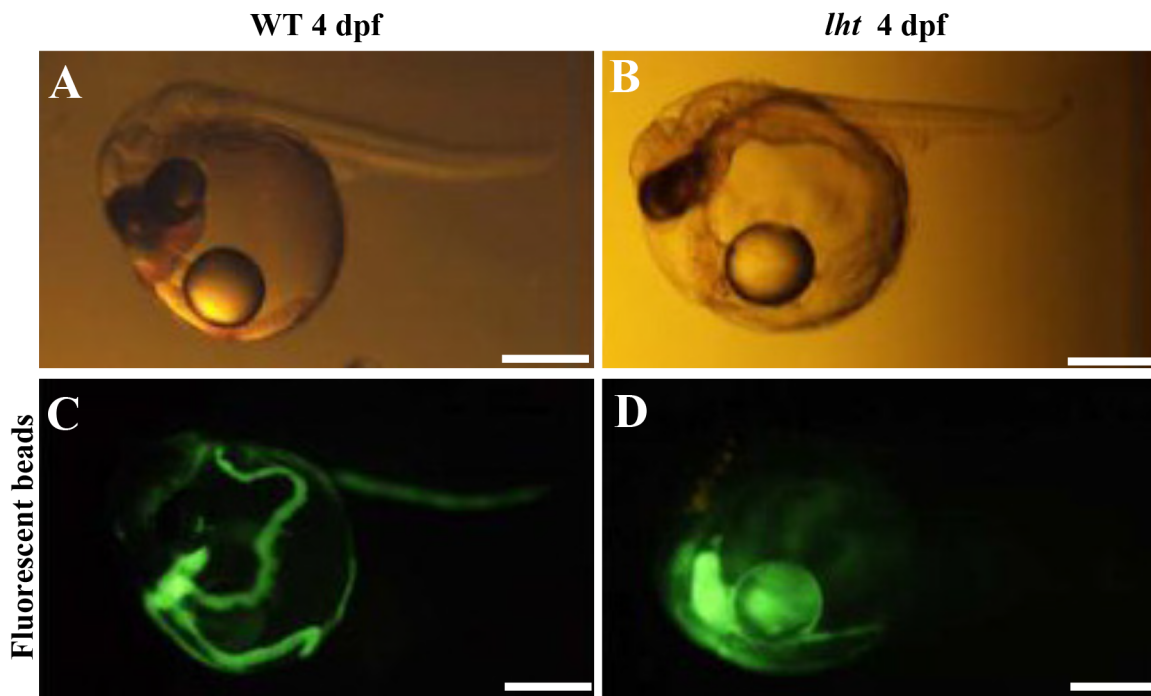

**Fig. S7**

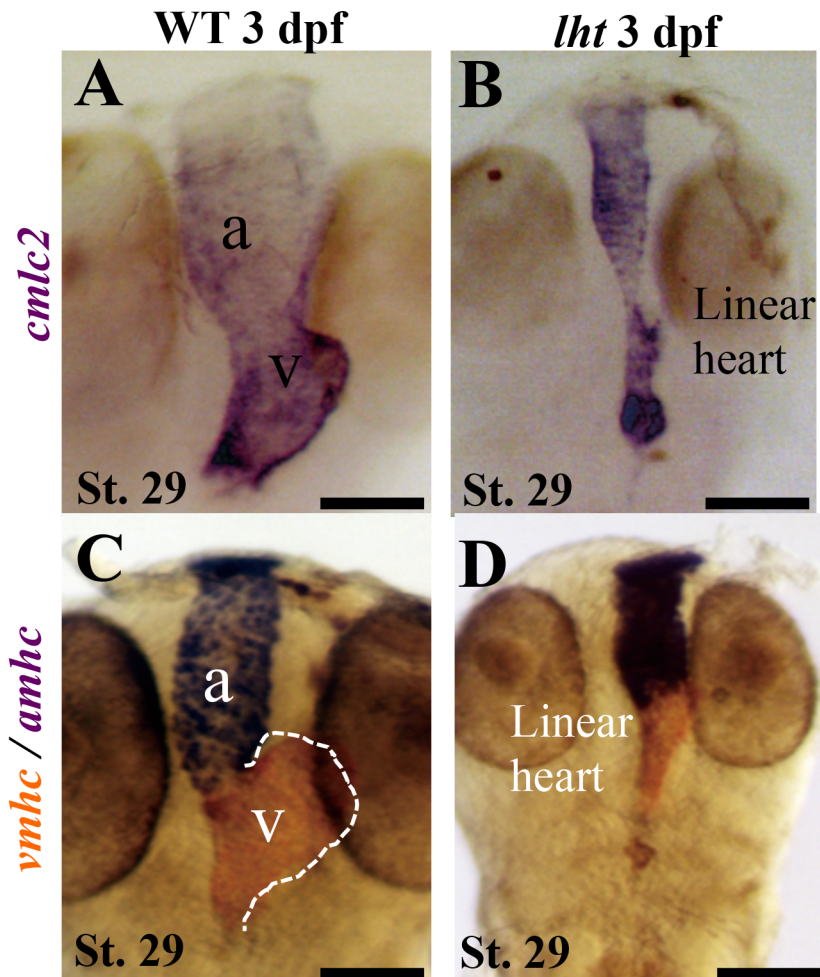



**Fig. S8**

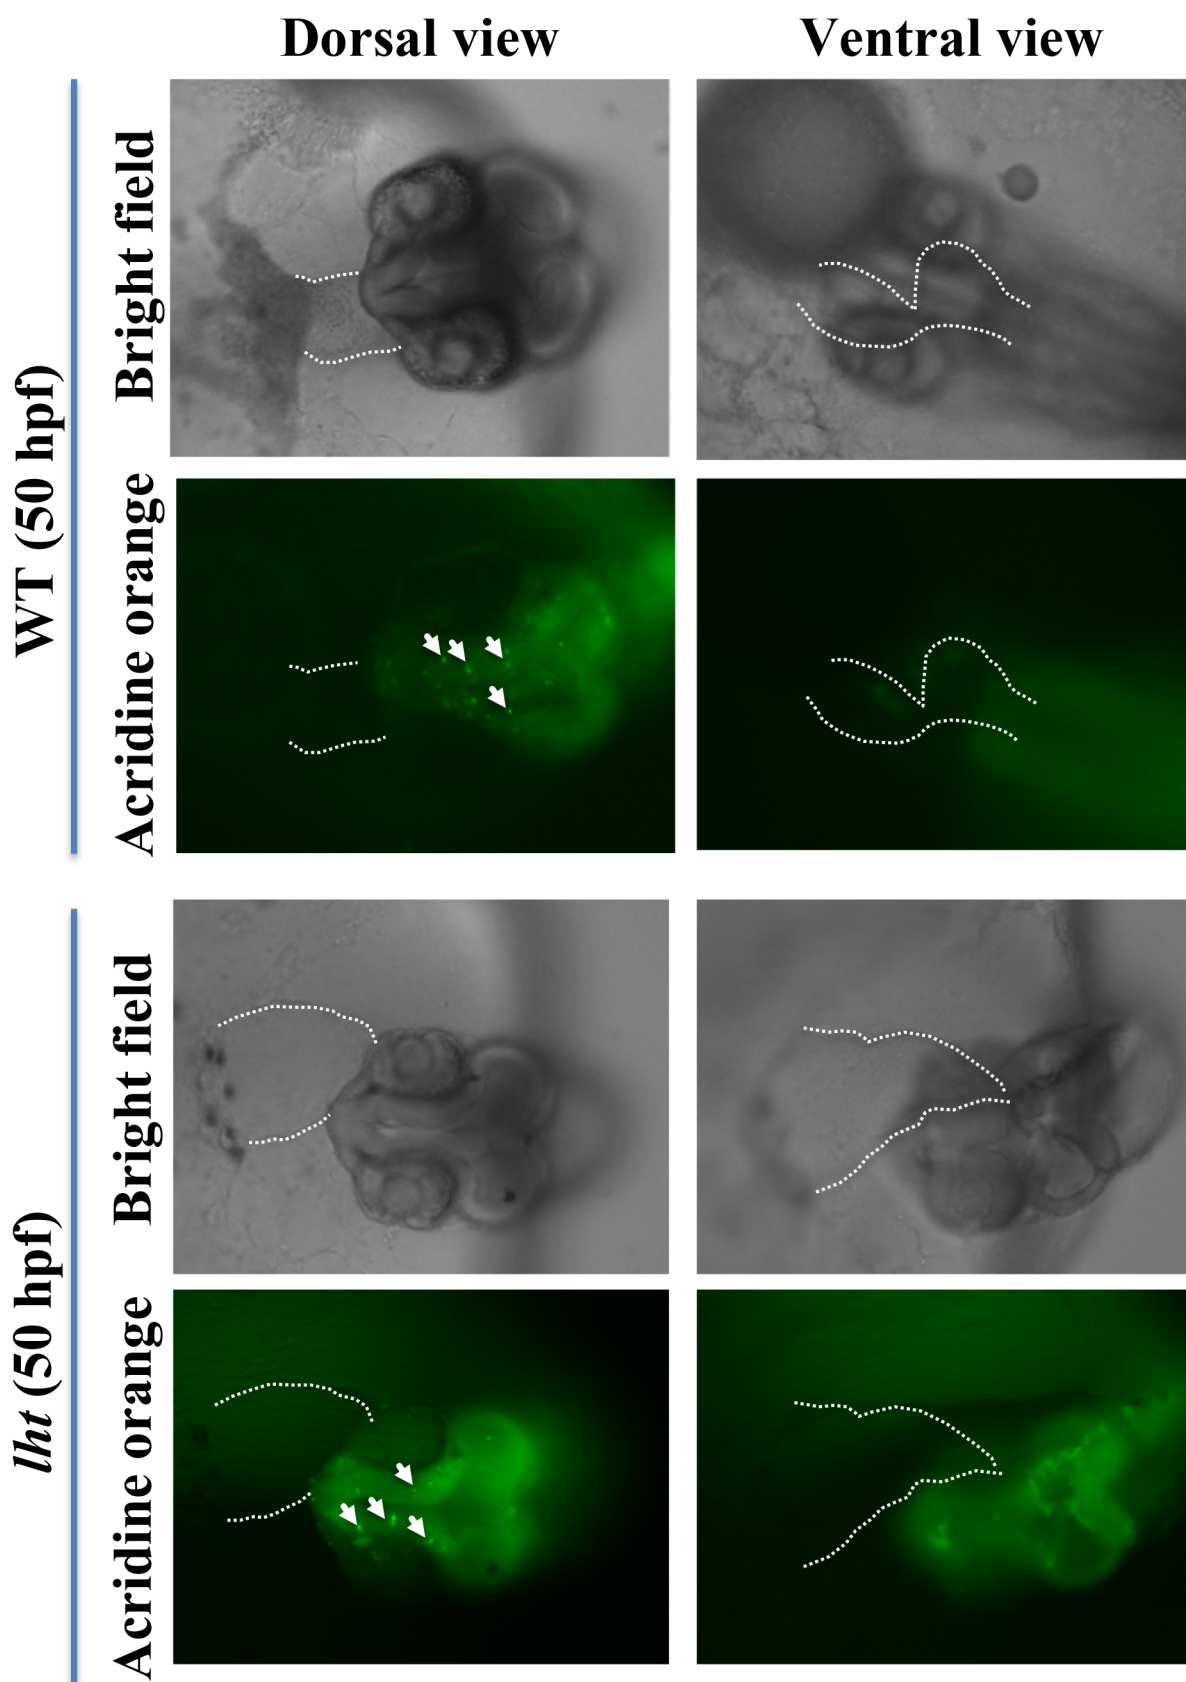

Fig. S9

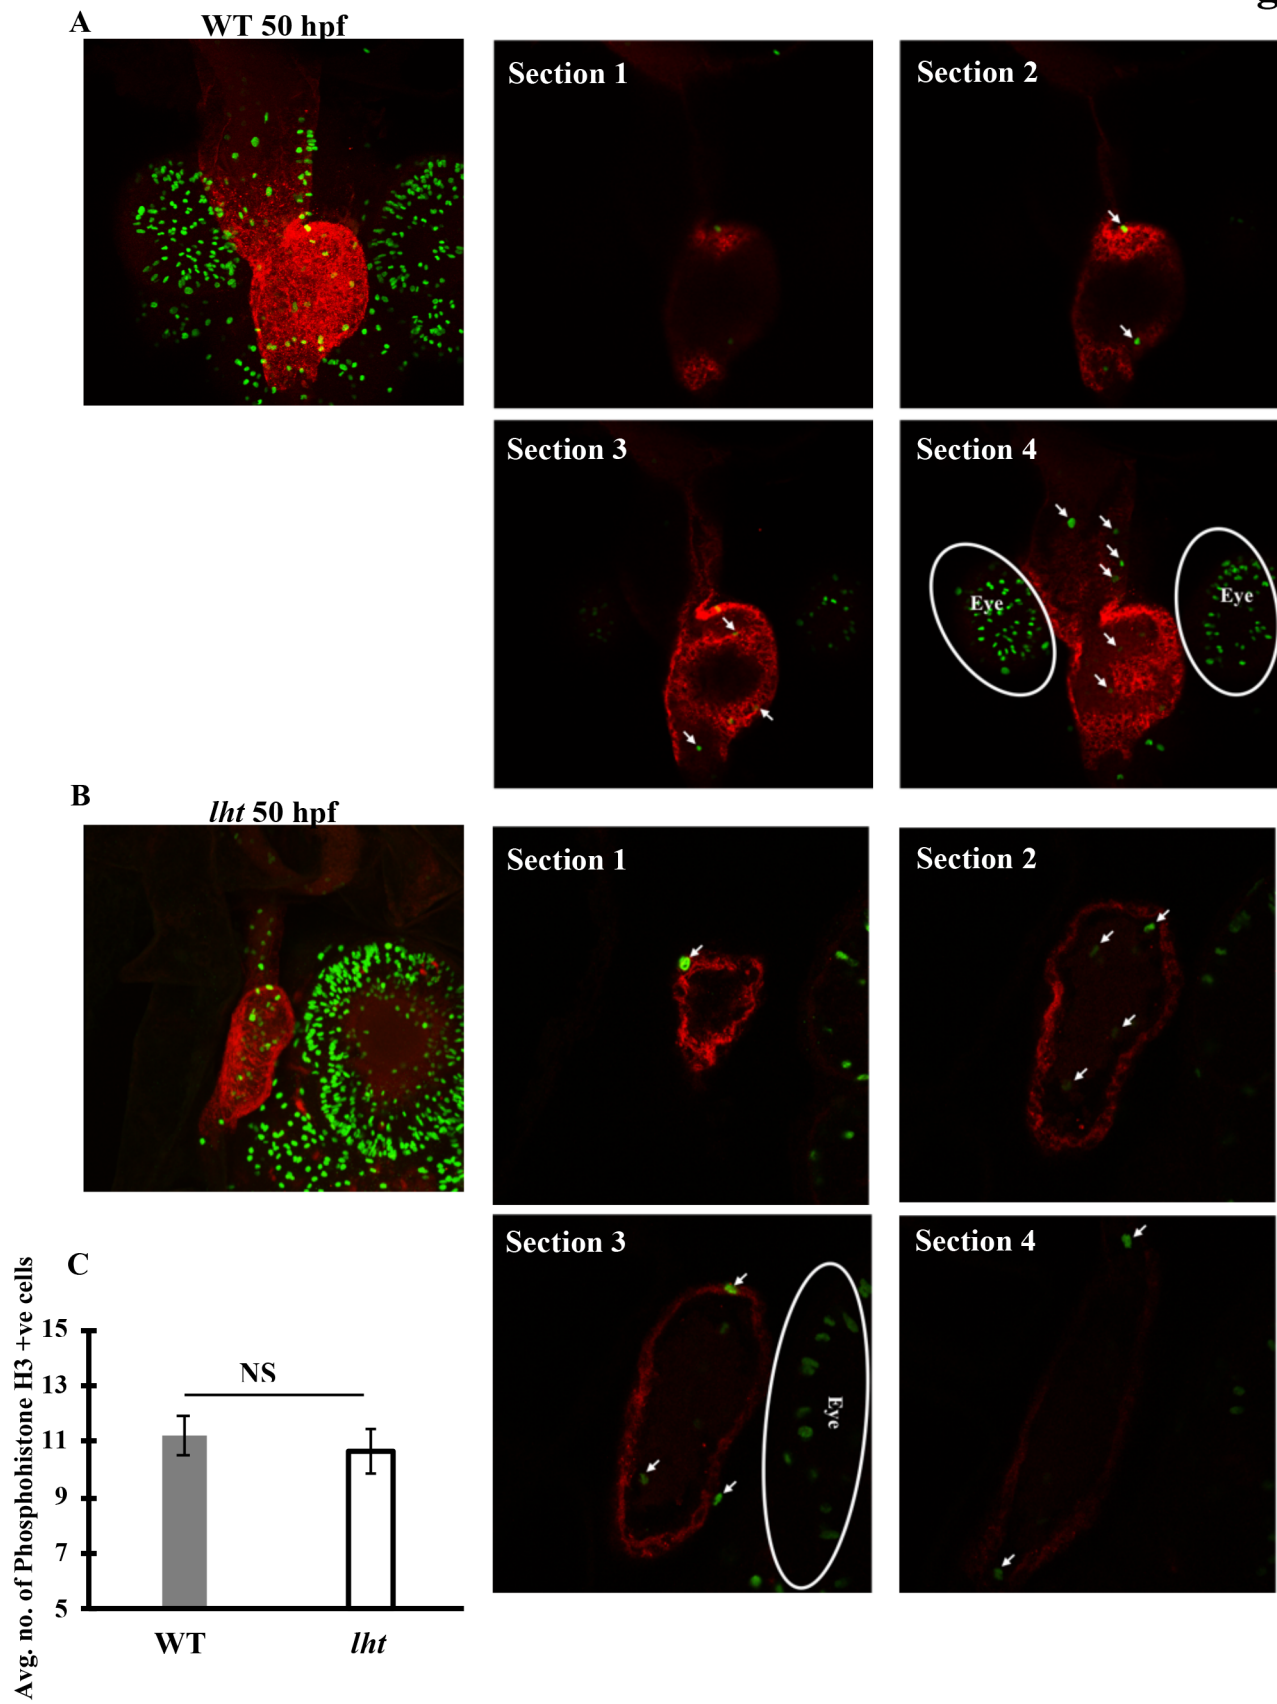

**Fig S10**

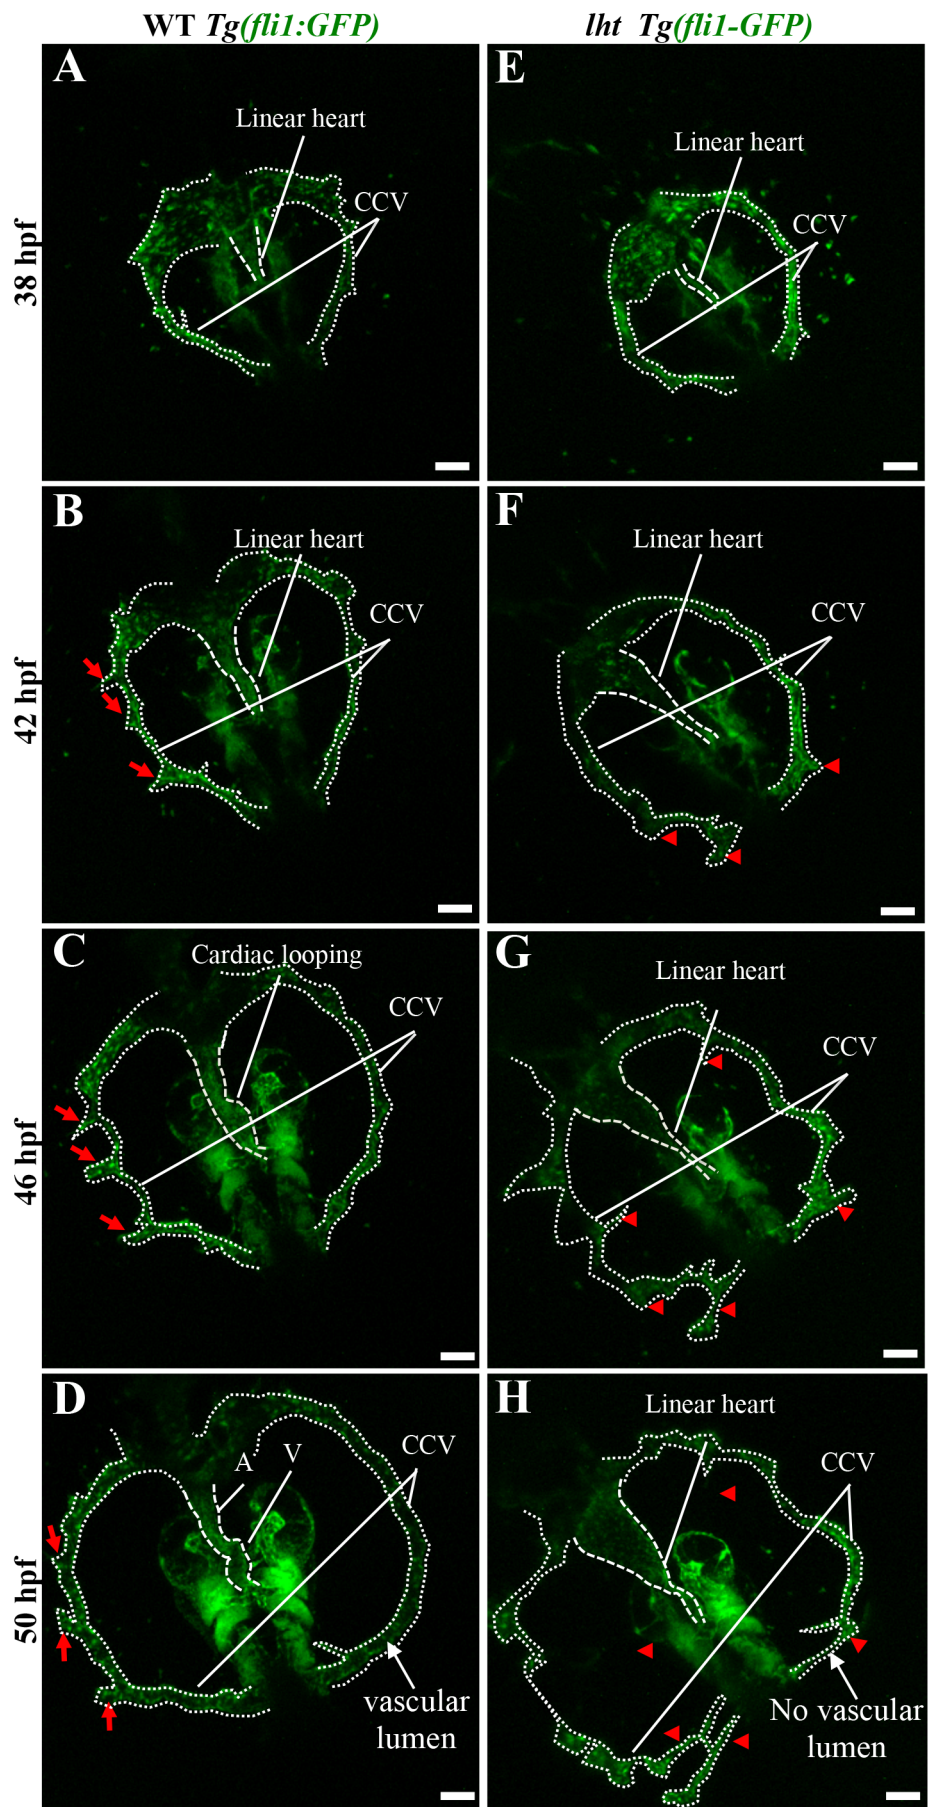

**Fig. S11**

**WT 2.3 dpf (after yolk removal)**

**etgase**

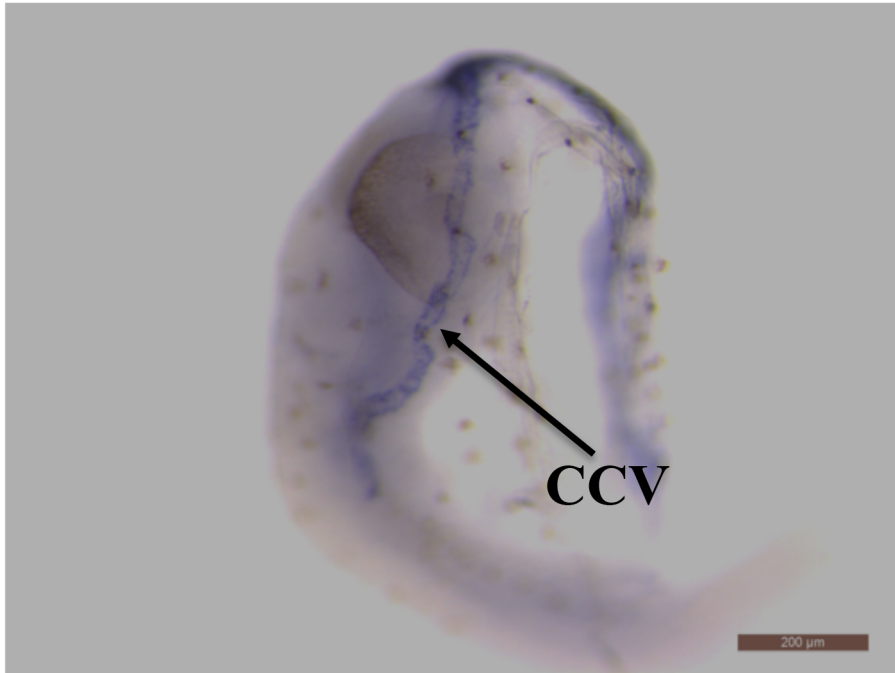





**Fig. S13**

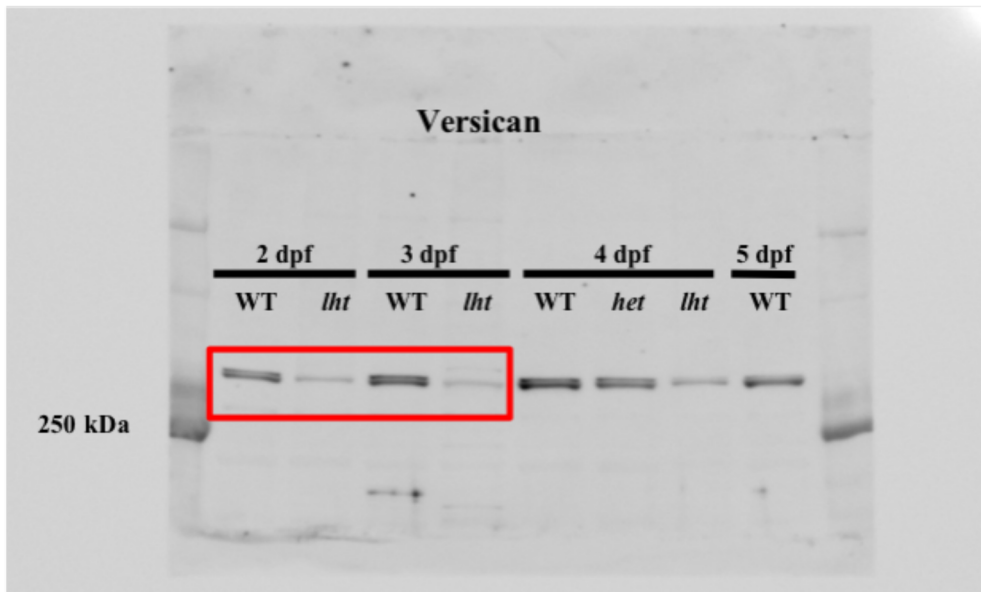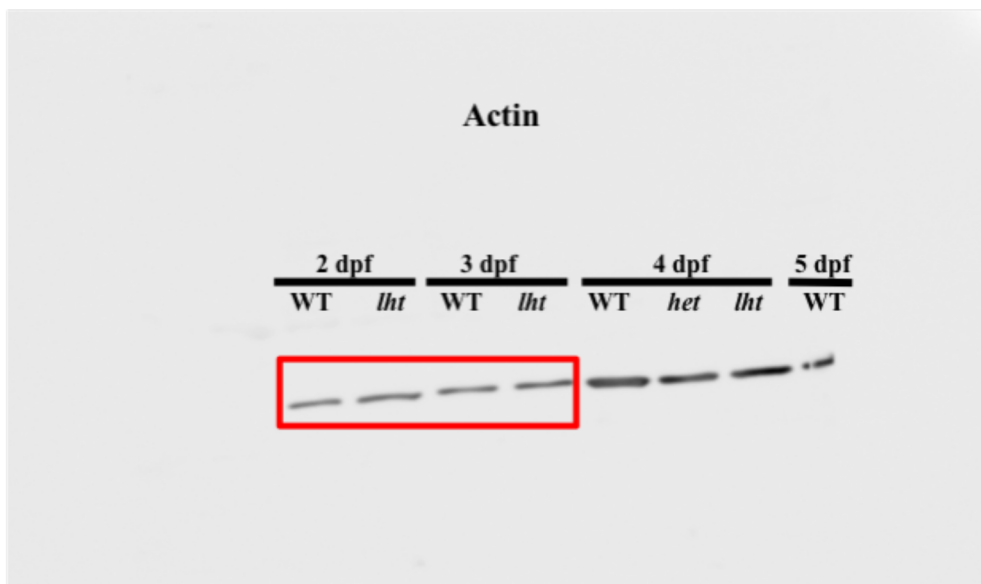

**Fig. S14**

**Versican**

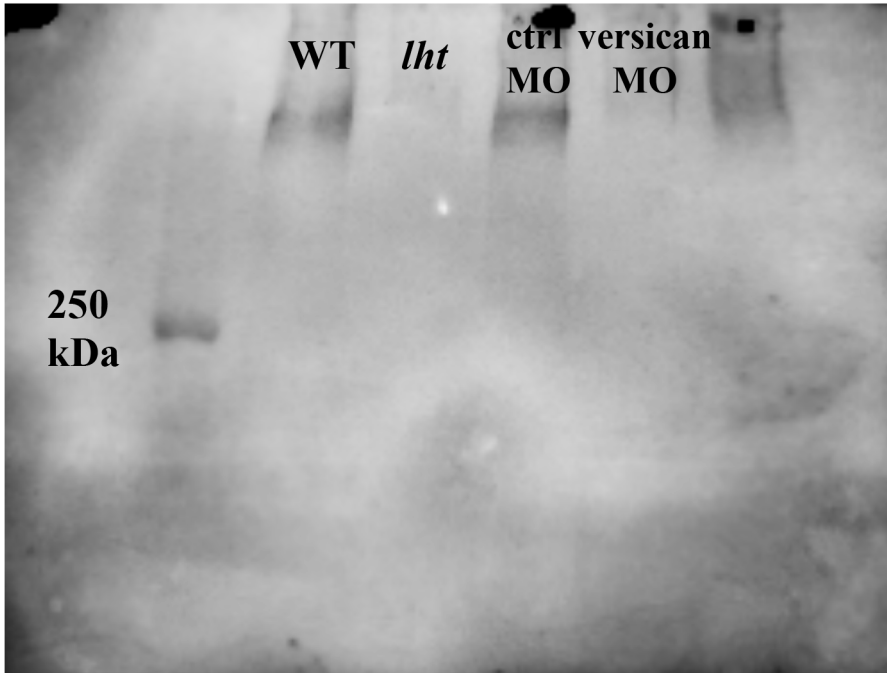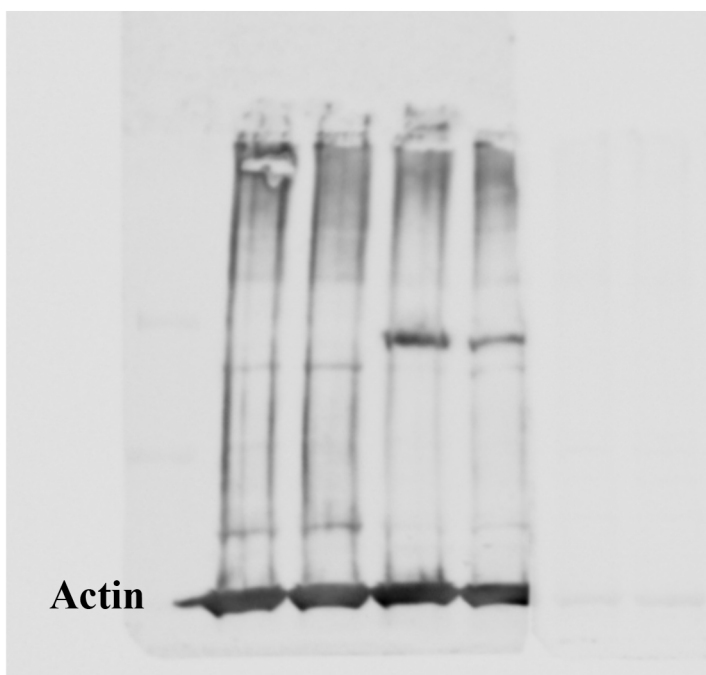

**TABLE 1: Primers used for mapping**

| <b>Contig. Name</b> | <b>Forward Primer (5'-----3')</b> | <b>Reverse Primer (5'-----3')</b> | <b>Restriction Enzyme</b> |
|---------------------|-----------------------------------|-----------------------------------|---------------------------|
| Olb0807j            | TCGACACCTTCTGTTTGTGAGAGCG         | GGCCTTAGCAGTTGTTTTCTGGCA          | Hinfl                     |
| MFOISSA038C07       | CCTGTCGTTGCTGAGTCCTTC             | AGGTGTAATGCTGTTCGACCTC            | RSaI                      |
| O11523              | ATTTAGTCCCCCAGGAGTGG              | CGTTCTCGTTTCTCCTGCAA              | RSaI                      |
| O112320             | GCAGGTGGAAGTCGACAAA               | CCAATGGACCATCACTTCC               | RSaI                      |
| O112338i5           | TCCTTCAAAGGGAGTGATGG              | ACCCAGAGGTGAAGACATGC              | Hinfl                     |
| O112419             | AGTCAAGGGCAAGGATGATG              | AGAGTTGGCTGATGGAGCAT              | Hae3                      |
| O11262li4           | TCTGCCATCTCTACTTCTTATGG           | TGAGGACAGGTCTGCACTGTT             | Hinfl                     |
| O1102119            | CCAGCCAGAAGAACAAATGC              | GCGAAAGCCCTGTTAAAAC               | RSaI                      |
| TiT8j07             | TGAGCATTGGGTTTACTGTG              | ACTTGTTGCCGCTTGAGATG              | RSaI                      |

**TABLE 2: Primers used to verify splicing of versican gene**

| <b>Primer Name</b> | <b>Forward Primer (5'-----3')</b> | <b>Primer Name</b> | <b>Reverse Primer (5'-----3')</b> |
|--------------------|-----------------------------------|--------------------|-----------------------------------|
| Vcan ex 3          | CAGTGCCCAGTCATCCTGAA              | Vcan ex 4          | ATCTTGACAGGCCCGAACAG              |
| Vcan ex 4          | CTGTTTCGGGCCTGTCAAGA              | Vcan ex 5          | TGCCAGGGTTAGTCATGAGG              |
| Vcan ex 5          | CCTCATGACTAACCCTGGCA              | Vcan ex 6          | CCATAGTCGCATCTGTCTAGC             |
| Vcan ex 6          | CCAGAATTCAGTGTGGGGGA              | Vcan ex 7          | TGGATGGAGCCATGCTAGTG              |
| Vcan ex 7          | CTACCACAATAAGTTAGAGGAACAT         | Vcan ex 8          | AGACTTAGCAGGGATCCTCG              |
| Vcan ex 7          | CTACCACAATAAGTTAGAGGAACAT         | VCan ex 9          | AAGAGGACCAGTGTAACCGG              |
| Vcan ex 6          | ATGCCCTTGACAAGCACTGC              | Vcan ex 8          | AGACTTAGCAGGGATCCTCG              |
| Vcan ex 6          | ATGCCCTTGACAAGCACTGC              | Vcan ex 9          | AAGAGGACCAGTGTAACCGG              |
| Vcan ex 8          | GATGGCAAACAACCTGGCGA              | Vcan ex 9          | AAGAGGACCAGTGTAACCGG              |
| Vcan ex 9          | CCGGTTACACTGGTCCTCTT              | Vcan ex 11         | CATTCTCGCTCTGCTGAGTC              |
| Vcan ex 11         | GACTCAGCAGAGCGAGAATG              | Vcan ex 13         | CGTCATTCCACTGTCCATCC              |
| Vcan ex 13         | GGATGGACAGTGGAATGACG              | Vcan ex 15         | GCTCCTCTGGTAGCTTGAAG              |

**TABLE 3: Primers for real-time PCR**

| <b>Primer Name</b> | <b>Forward Primer (5'-----3')</b> | <b>Reverse Primer (5'-----3')</b> |
|--------------------|-----------------------------------|-----------------------------------|
| BNP                | CTTCATCCCTTTTTGGGGGC              | TTCTCGCTCCTCCTCTGTG               |
| Versican           | GGATGGACAGTGGAATGACG              | GCTCCTCTGGTAGCTTGAAG              |

**TABLE 4: Primers for in-situ Probe design**

| <b>Primer Name</b> | <b>Forward Primer (5'-----3')</b> | <b>Reverse Primer (5'-----3')</b> |
|--------------------|-----------------------------------|-----------------------------------|
| Cmlc2              | AATGTCTTTTCCATGTTGAGC             | CTCCTCTTTCTCATCCCCATG             |
| Amhc               | TGCACTGATGGCTGAATTTG              | ACTTGATCTACA CCTTGGCC             |
| Vmhc               | GCTGAGATGTCCGTGTATGGTGC           | GCTCCTCACGAGGCCTCTGCTTG           |
| Bnp                | GATCCATCCATCCATCATCC              | TGATACTTTAAAGACACAATGTCCAA        |
| Versican           | CACGACAATTCTCCCCATCT              | TGCTCTTCCAGTCTCCTGGT              |
| e-tgase            | CCCACCCCTGACAGAGTTTC              | GTCACAACACGAGACGGGAT              |
| TMEM 205           | GCTCTACGTCTGAACTTGCG              | ATCTCATGCCAGCTTGTTCAAA            |
| Egfl7              | GCACCTACAAGACCACCTAC              | GGGACGAGGAGAATCACGAA              |
